# Supplementary material for: Sustained delivery of doxorubicin from thermogelling poly(PEG/PPG/PTMC urethane)s for effective eradication of cancer cells
Source: Royal Society of Chemistry journal article supplement (doi:10.1039/c2jm33777k), 2012-01-01
Supplement: c2jm33777k.pdf [file c2jm33777k.pdf]

## Supporting Information for

### **Sustained delivery of doxorubicin from thermogelling poly(PEG/PPG/PTMC urethane)s for effective eradication of cancer cells**

Xian Jun Loh, <sup>\*a</sup> William Guerin, <sup>b</sup> Sophie M. Guillaume <sup>b</sup>

<sup>a</sup> Melville Laboratory for Polymer Synthesis, Department of Chemistry, University of Cambridge, Cambridge CB2 1EW, United Kingdom

<sup>b</sup> Institut des Sciences Chimiques de Rennes (UMR 6226), CNRS, Université de Rennes 1, Campus de Beaulieu, 35042 Rennes Cedex, France

\* Correspondence to [XianJun\\_Loh@scholars.a-star.edu.sg](mailto:XianJun_Loh@scholars.a-star.edu.sg)

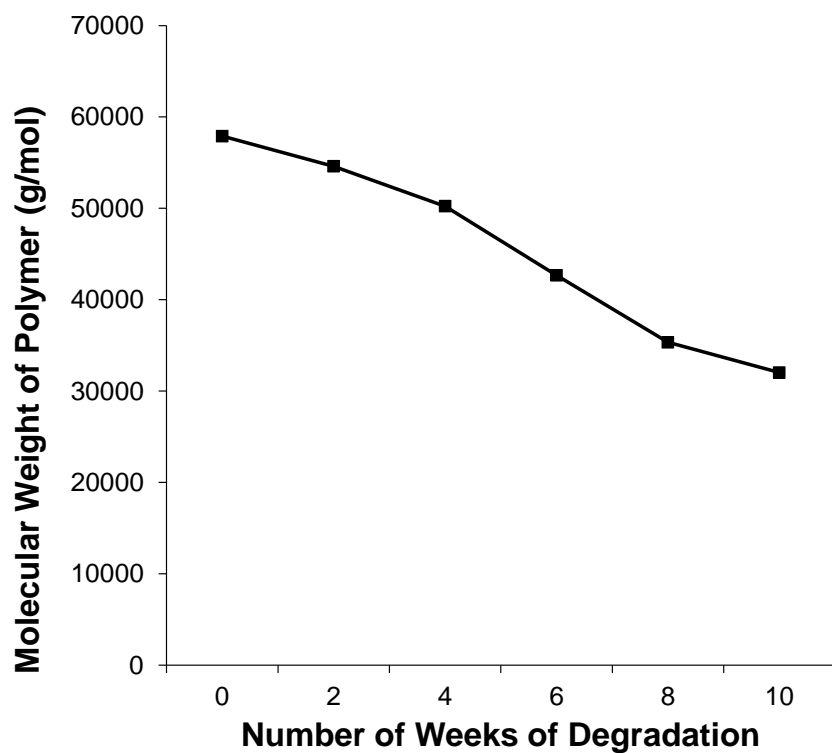

*Figure 1. Hydrolytic degradation profile of P1 copolymer at pH 7.4.*

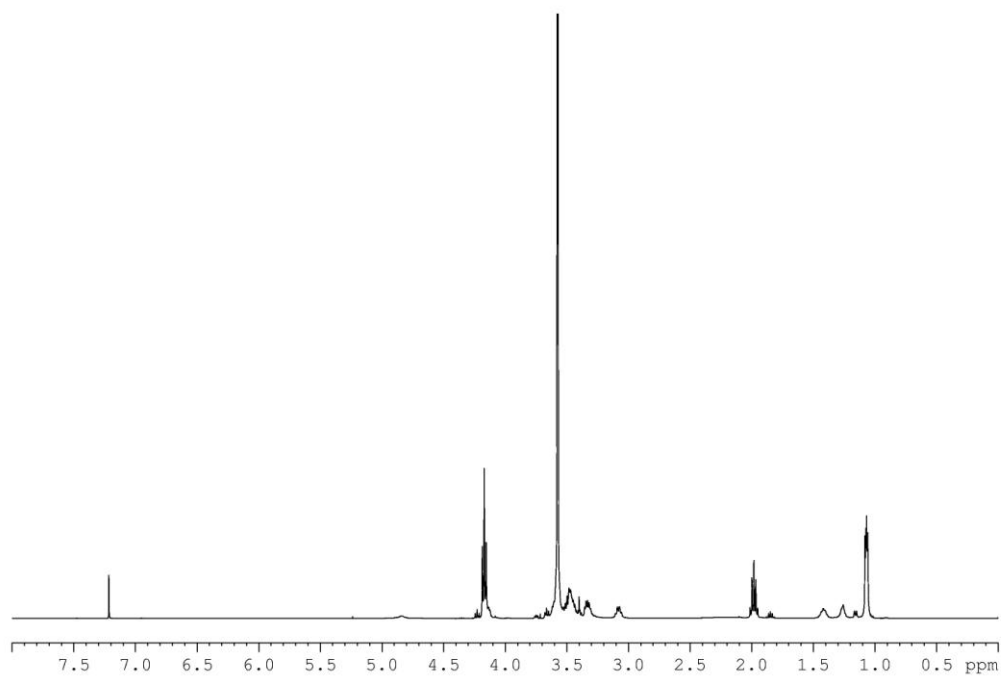

Figure 2.  $^1\text{H}$  NMR spectrum of P1 copolymer in  $\text{CDCl}_3$ .

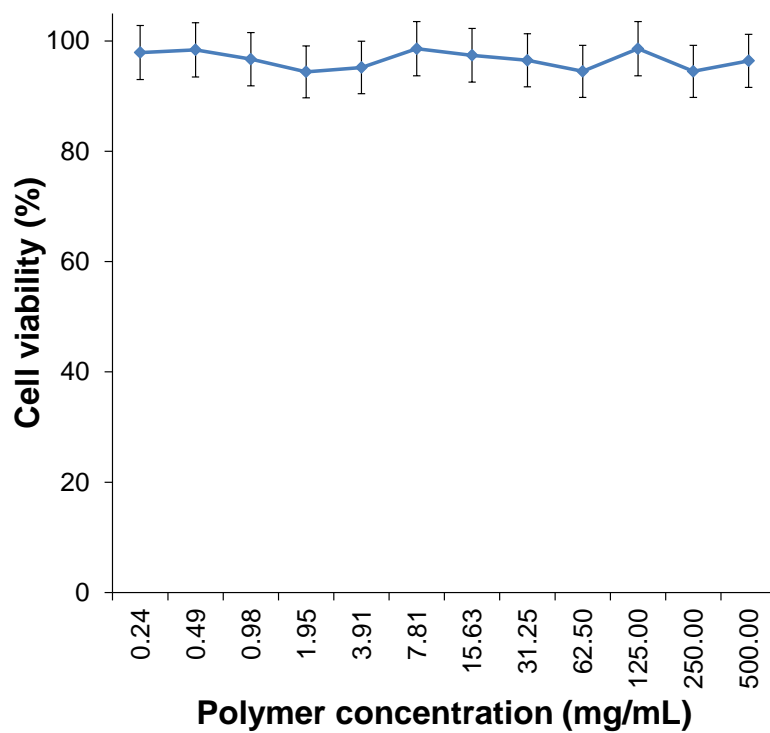

*Figure 3. Cell viability of HeLa cells incubated with known concentrations of poly(PEG/PPG/PTMC urethane), P1 copolymer.*

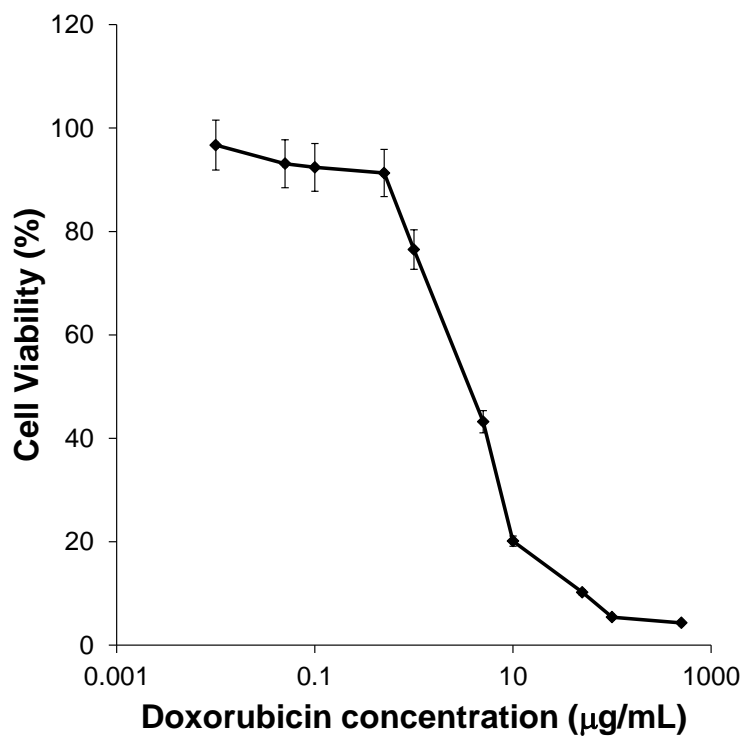

Figure 4. Cell viability of L929 cells incubated with known concentrations of doxorubicin.
